# Supplementary material for: Viscoplastic Modeling of Surface Relief Grating Growth on Isotropic and Preoriented Azopolymer Films
Source: Polymers (Basel). 2023 Jan 16;15(2):463. doi: 10.3390/polym15020463 (PMC9865333; doi:10.3390/polym15020463)
Supplement: Supplementary file 1 [file polymers-15-00463-s001.zip]

Archive with 4 entries (4 files):
- SI_SRG_growth.pdf
- Video S1.mp4
- Video S2.mp4
- Video S3.mp4
